# Supplementary material for: Engineering hollow mesoporous silica nanocontainers with molecular switches for continuous self-healing anticorrosion coating
Source: Royal Society of Chemistry journal article supplement (doi:10.1039/c5ta01188d), 2015-01-01
Supplement: c5ta01188d1.pdf [file c5ta01188d1.pdf]

## SUPPORTING INFORMATION

### Engineering Hollow Mesoporous Silica Nanocontainers with Molecular Switches for Continuous Self-Healing Anticorrosion Coating

Tao Chen<sup>ab</sup>, Renpeng Chen<sup>a</sup>, Zhong Jin<sup>\*a</sup> and Jie Liu<sup>\*c</sup>

<sup>a</sup> Key Laboratory of Mesoscopic Chemistry of MOE, School of Chemistry and Chemical Engineering, Nanjing University, Nanjing 210093, China. Tel: +86-25-83686220; E-mail: zhongjin@nju.edu.cn

<sup>b</sup> School of Chemical Engineering, Nanjing University of Science and Technology, Nanjing 210094, China.

<sup>c</sup> Department of Chemistry, Duke University, Durham, USA. E-mail: j.liu@duke.edu

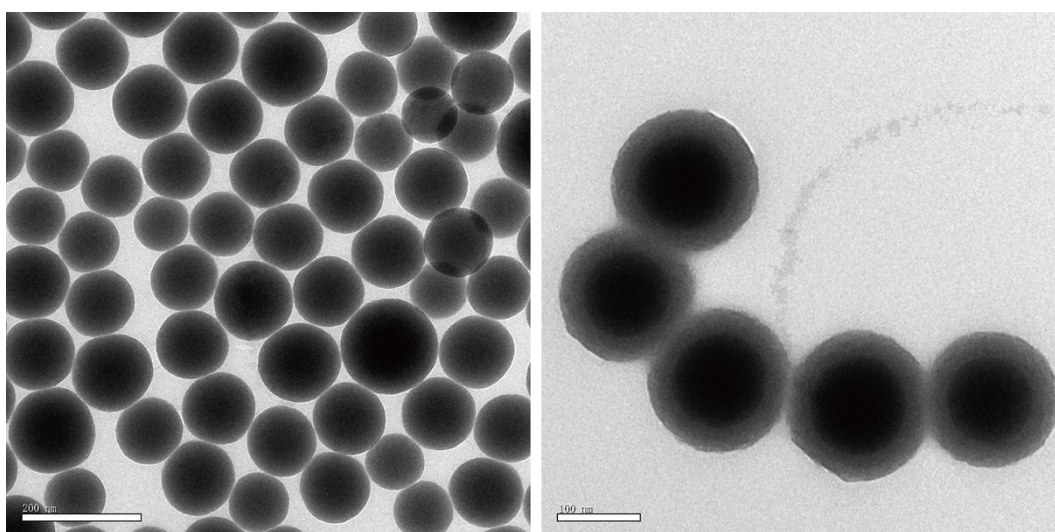

**Figure S1.** SEM micrographs of a) SiO<sub>2</sub> and b) SiO<sub>2</sub>@CTAB/Azo-SiO<sub>2</sub> particles.

**Figure S2.** FTIR spectra of azobenzene and Azo-HMSs. It can be found that azobenzene has been successfully immobilized into mesoporous silica layer by the appearance of the azobenzene vibration modes ( $\blacktriangle$ ).

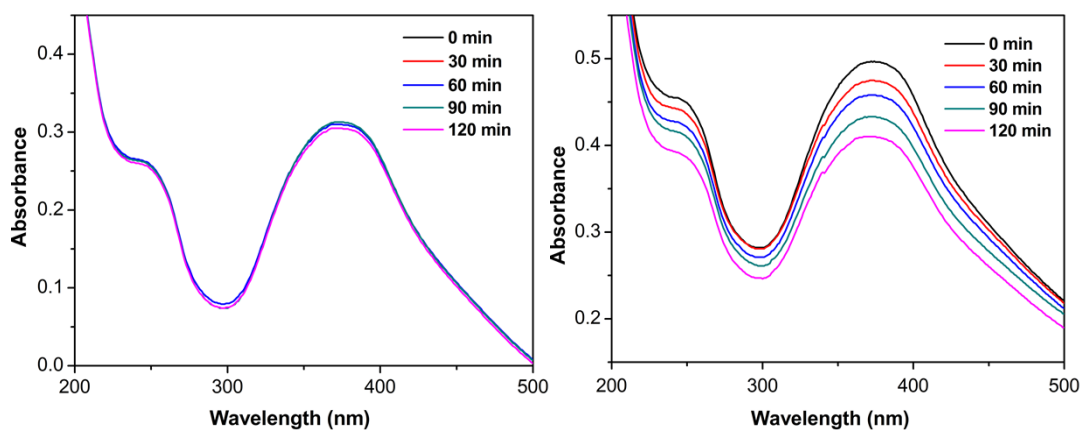

**Figure S3.** (left) UV-vis absorption spectral changes of Azo-HMSs under visible light. (right) UV-vis absorption spectra of Azo-HMSs before and after irradiation with UV light (365 nm) for 0 to 120 min.

**Figure S4.** BET nitrogen adsorption/desorption isotherms (left) and BJH pore size distribution (right) of Azo-HMSs and BTA@Azo-HMSs. Nitrogen adsorption-desorption isotherm measurements on Azo-HMSs and BTA@Azo-HMSs show an average BET surface area of approximately 991.1 and 384.2  $\text{m}^2\cdot\text{g}^{-1}$ , respectively, and a total pore volume of 0.86 and 0.35  $\text{mL}\cdot\text{g}^{-1}$ . The pore size distribution of both Azo-HMSs and BTA@Azo-HMSs is as narrow as  $\sim 2.1$  nm.

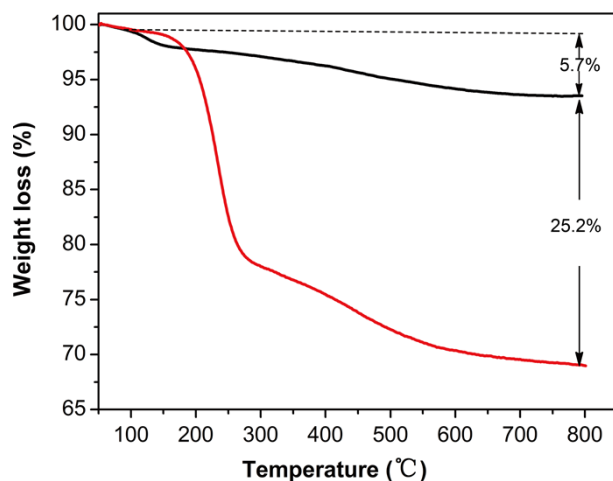

**Figure S5.** TGA profiles of Azo-HMSs and BTA@Azo-HMSs. TGA data show that the weight loss of Azo-HMSs and BTA@Azo-HMSs are 5.7 % and 30.9 %. The amount of azobenzene is determined to be 0.2  $\text{mmol}\cdot\text{g}^{-1}$   $\text{SiO}_2$  for Azo-HMSs. The loading amount of BTA is 252  $\text{mg}\cdot\text{g}^{-1}$   $\text{SiO}_2$ , calculated by the difference of weight loss of Azo-HMSs and BTA@Azo-HMSs.

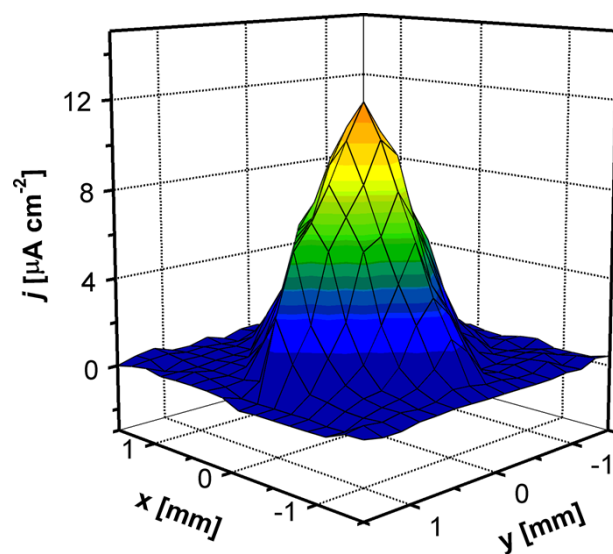

**Figure S6.** SVET current density maps obtained after the fourth times of repeating scratching.
